# Supplementary material for: Anthropogenic aerosol forcing under the Shared Socioeconomic Pathways
Source: Copernicus journal article supplement (doi:10.5194/acp-2019-606), 2019-07-08
Supplement: Supplementary file 1 [file acp-2019-606-supplement.pdf]

1 Supplementary Information

2

3 *Table S1: RFari in 2020 and 2050 relative to 1750 by component for SSP1-1.9 and SSP3-7.0*

|        | Year | total | Sulfate | BC   | POA   | Biomass | Nitrate | SOA    |
|--------|------|-------|---------|------|-------|---------|---------|--------|
| SSP119 | 2020 | -0.12 | -0.22   | 0.23 | -0.05 | 0.01    | -0.03   | -0.02  |
|        | 2050 | -0.08 | -0.08   | 0.05 | -0.09 | 0.006   | -0.02   | -0.007 |
| SSP370 | 2020 | -0.13 | -0.27   | 0.32 | -0.06 | 0.01    | -0.04   | -0.03  |
|        | 2050 | -0.14 | -0.29   | 0.37 | -0.08 | 0.005   | -0.05   | -0.03  |

4

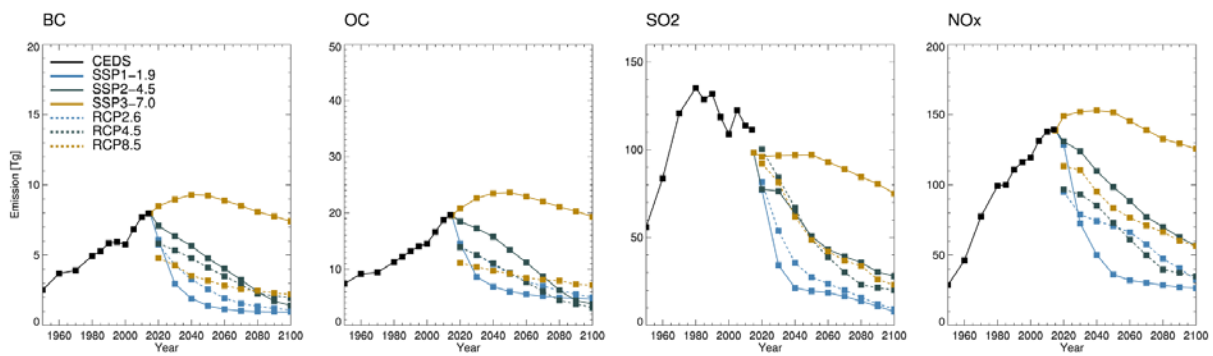

5

6 *Figure S1: Annual global fossil fuel plus biofuel combustion emissions of BC, OC, SO<sub>2</sub> and NO<sub>x</sub> over the*  
 7 *period 2015 to 2100 in SSP1-1.9, SSP2-4.5 and SSP3-7.0 (solid colored lines) and RCP2.6, RCP4.5 and*  
 8 *RCP8.5 (dashed lines). Also shown is the development from 1950 to 2014 from the CEDS inventory.*

9

10

11

12

13

14

15

16

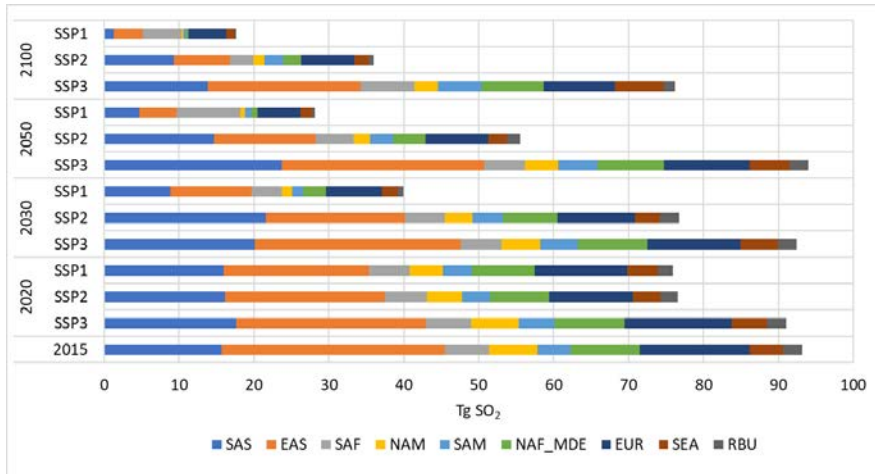

17

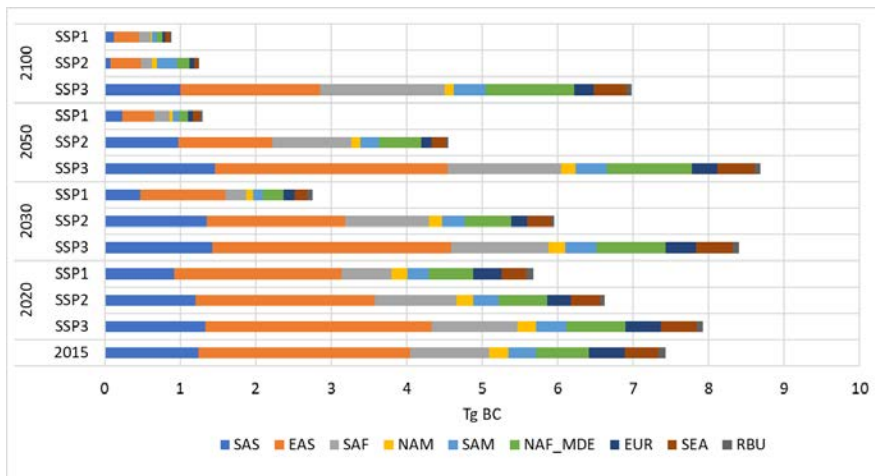

18 *Figure S2: Regional emissions of SO<sub>2</sub> (top) and BC (bottom) in 2015, 2020, 2030, 2050 and*  
19 *2100 following the three SSPs used in the present study.*

20

21

22

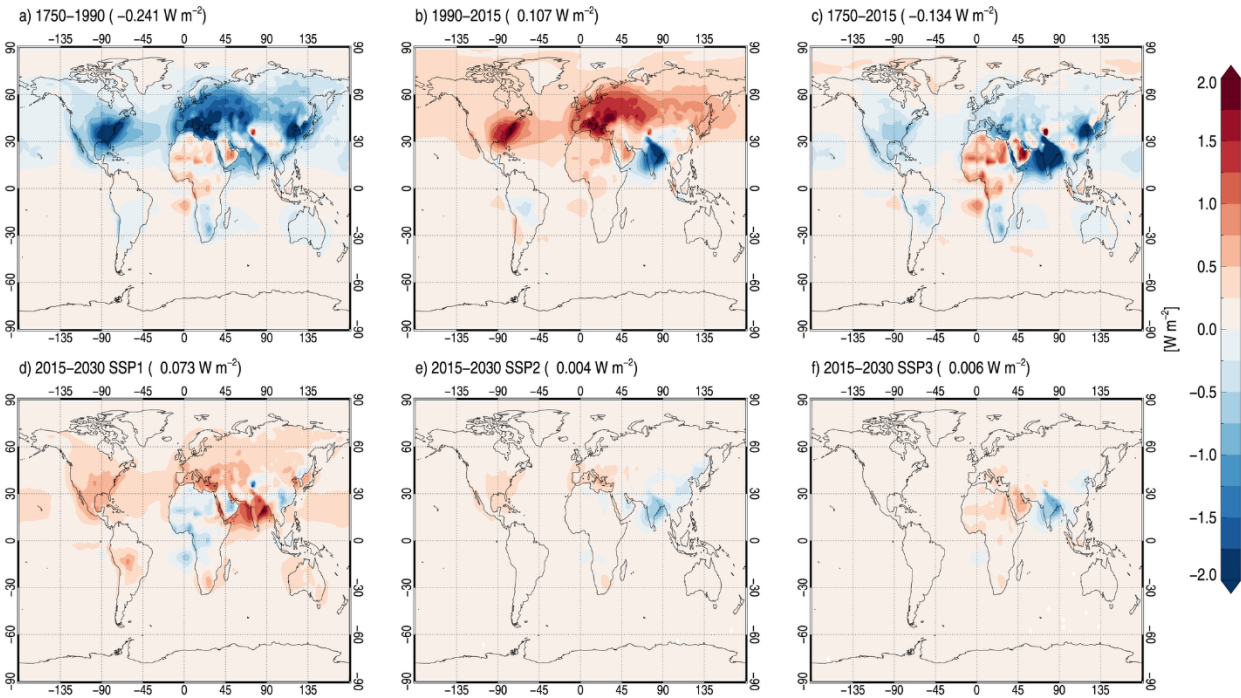

23

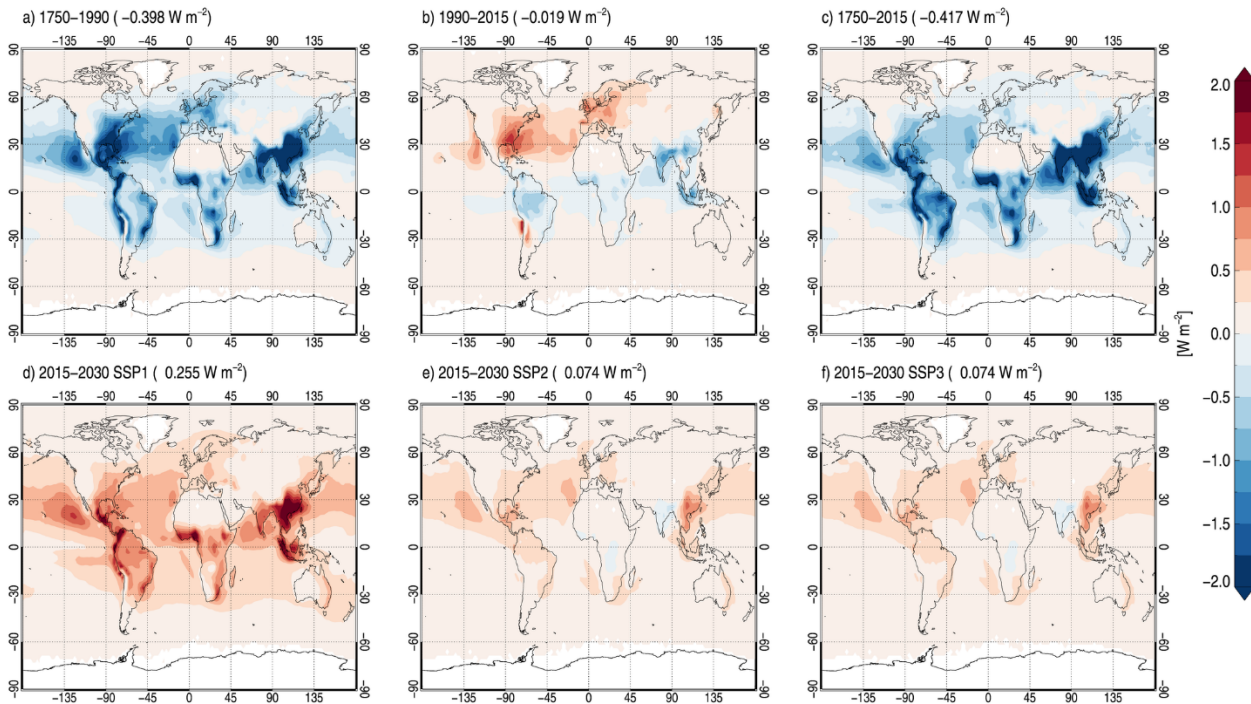

24

25 *Figure S3: changes in RFar (top) and RFac (bottom) for four time periods: 1750-1990,*  
 26 *1990-2015, 1750-2015, and 2015-2030 under SSP1-1.9, SSP2-4.5 and SSP3-7.0.*

27

28
